# Supplementary figures and images for: Mediodorsal thalamus is required for discrete phases of goal-directed behavior in macaques
Source: eLife journal article supplement (doi:10.7554/elife.37325), 2018-05-31

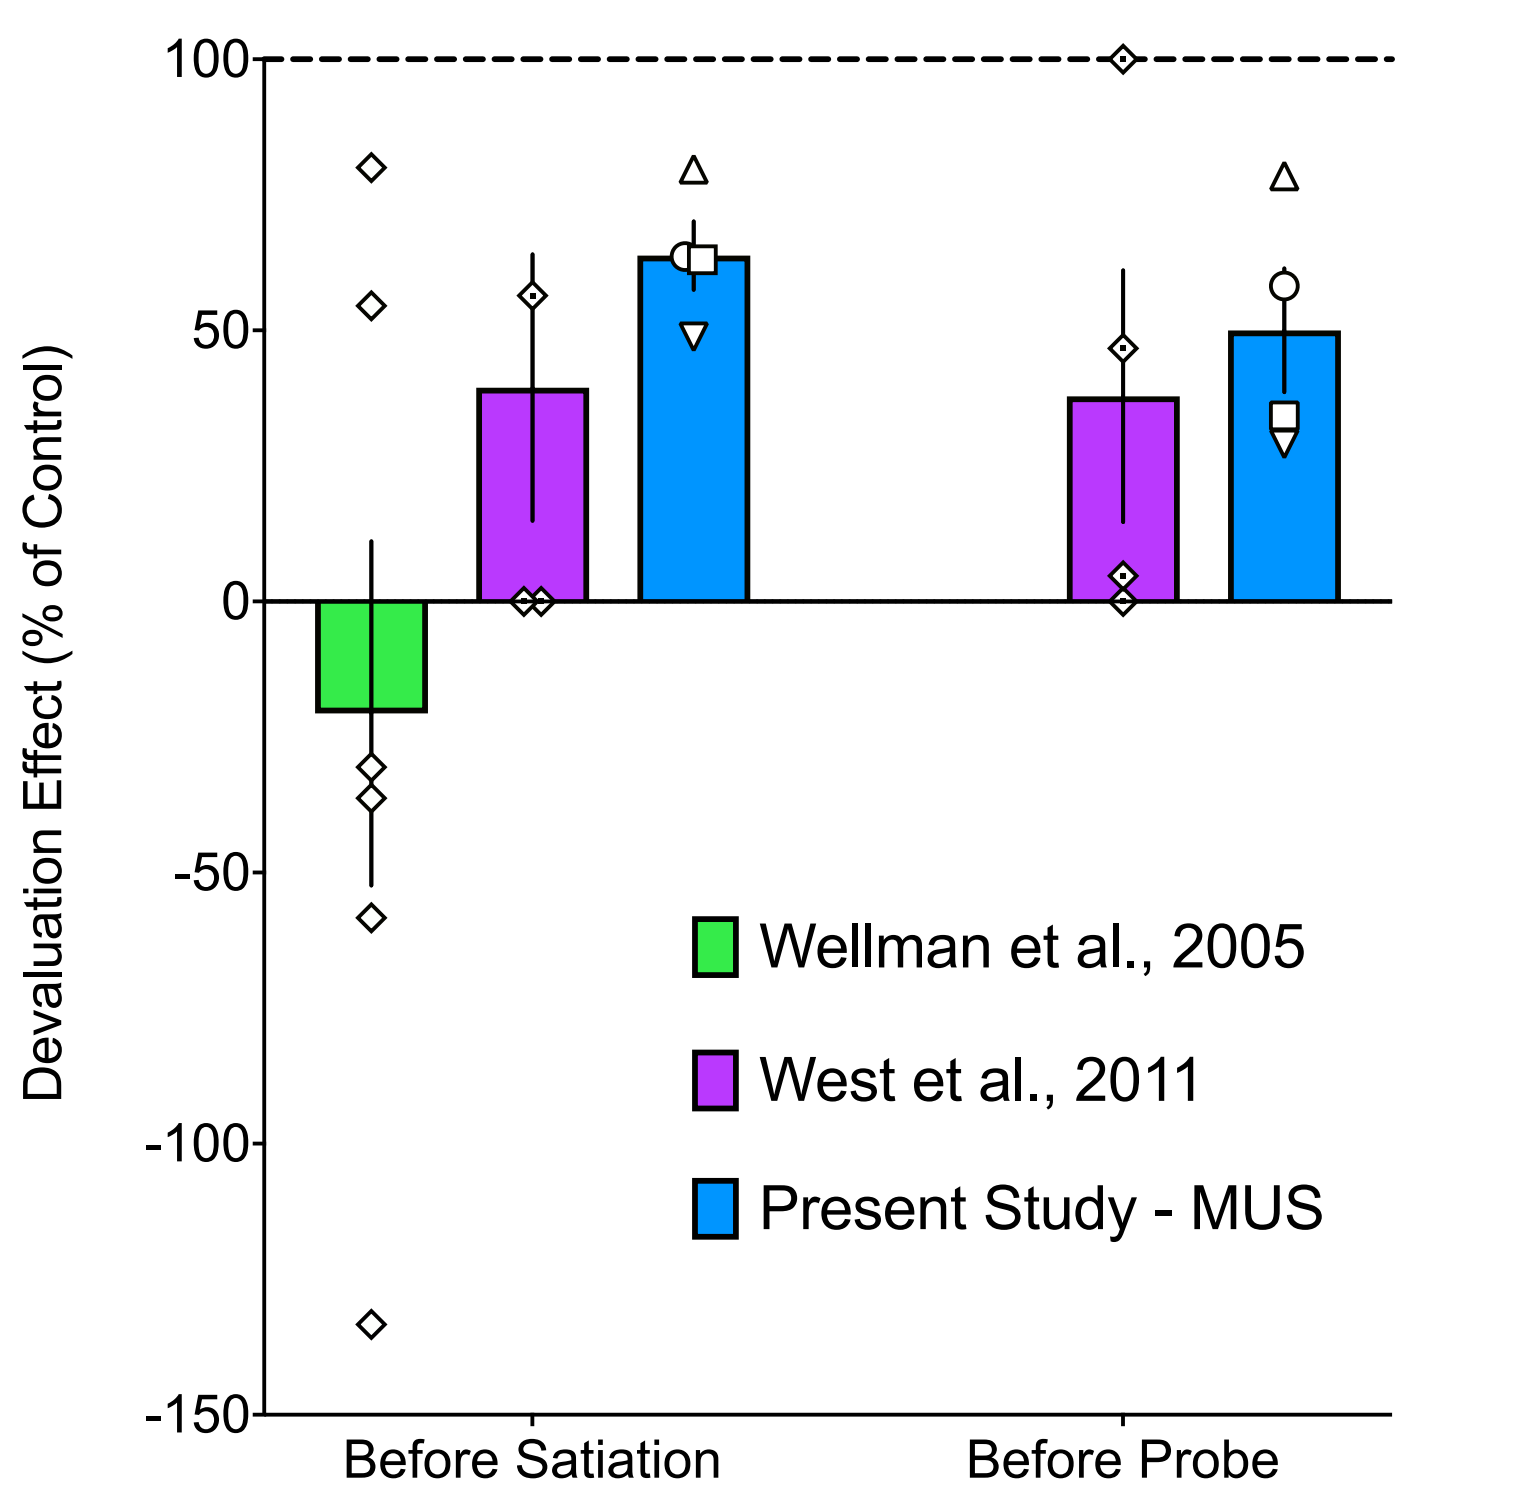

Supplement: supp [file elife-37325-supp-v1.zip]

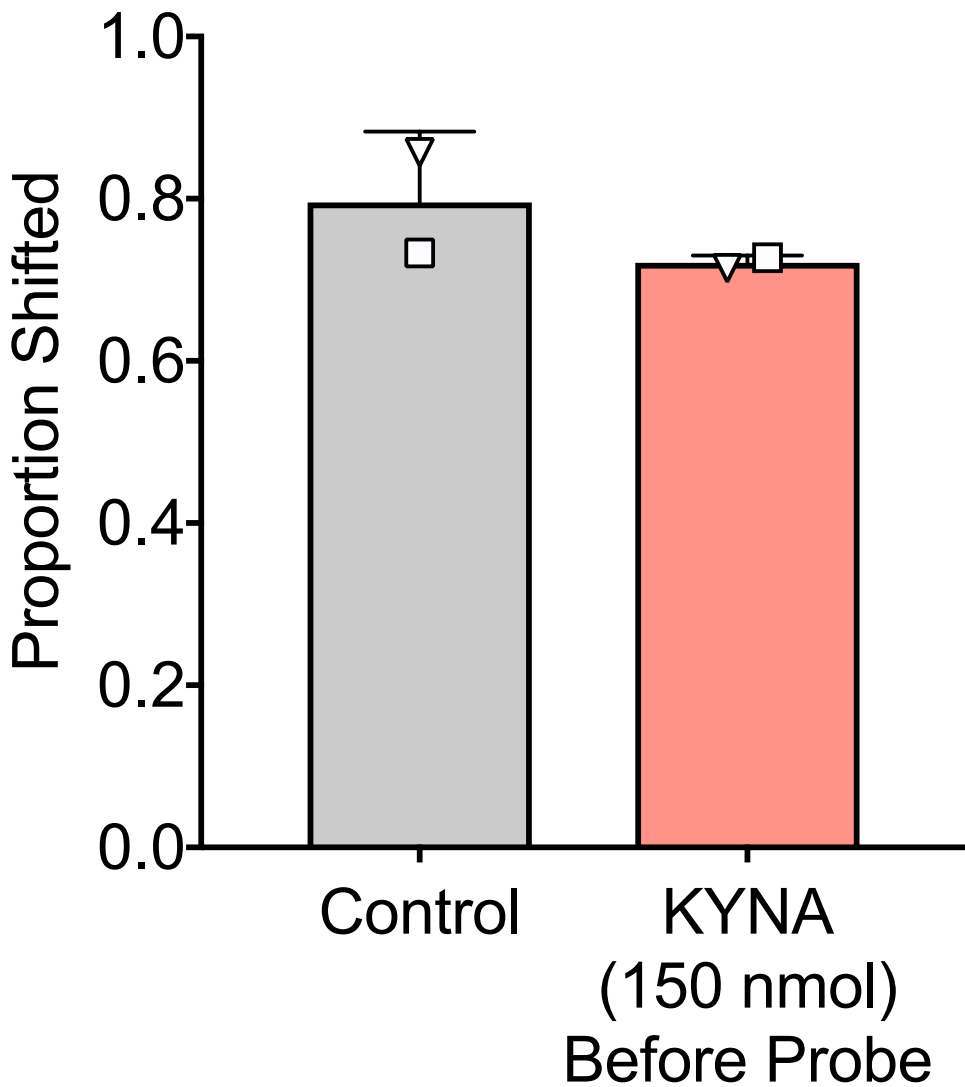

Supplement: supp [file elife-37325-supp-v1.zip]
